# Supplementary material for: Peracetylated 4-Fluoro-glucosamine Reduces the Content and Repertoire of N- and O-Glycans without Direct Incorporation
Source: PubMed Central journal article supplement — J Biol Chem. 2011 Apr 14;286(24):21717–31. doi: 10.1074/jbc.M110.194597 (PMC3122228; doi:10.1074/jbc.m110.194597), 2011-04-14
Supplement: supp_M110.194597_JBC_SUPPLEMENTAL_041211.pdf [file supp_M110.194597_JBC_SUPPLEMENTAL_041211.pdf]

## SUPPLEMENTAL FIGURE LEGENDS

**Supplemental Fig. 1. MALDI-TOF Spectra of Permethylated N- and O-glycans Derived from Untreated and 4-F-GlcNAc-Treated T cells.** N-glycomic profile of (a) untreated and (b) 4-F-GlcNAc-treated T cells; O-glycomic profile of (c) untreated and (d) 4-F-GlcNAc-treated T cells. N- and O-glycomic profiles were obtained from the 50% MeCN fraction from a C<sub>18</sub> Sep-Pak column ("Materials and Methods"). Cartoon structures are according to the Consortium for Functional Glycomics (<http://www.functionalglycomics.org>) guidelines. All molecular ions are [M+Na]<sup>+</sup>. Putative structures based on composition, tandem MS and biosynthetic knowledge. Structures that show sugars outside a bracket have not been unequivocally defined.

**Supplemental Fig. 2. MALDI-TOF Mass Spectra of Permethylated N-glycans from Endo-β-Galactosidase Digestion of KG1a and T cells.** Profile of N-glycans of (a) untreated and (b) 4-F-GlcNAc-treated KG1a cells; profiles of N-glycans of (c) untreated and (d) 4-F-GlcNAc treated T cells. All profiles are from the 50% MeCN fraction from a C<sub>18</sub> Sep-Pak column ("Materials and Methods"). All molecular ions are [M+Na]<sup>+</sup>. Putative structures based on composition, tandem MS and biosynthetic knowledge. Cartoon structures are according to the Consortium for Functional Glycomics (<http://www.functionalglycomics.org>) guidelines.

**Supplemental Fig. 3. Low Mass MALDI-TOF Mass Spectra of Permethylated N-glycans from Endo-β-Galactosidase Digestion of T cells.** Profile of N-glycans of (a) untreated and (b) 4-F-GlcNAc-treated T cells. Profiles are from the 35% MeCN fraction from a C<sub>18</sub> Sep-Pak column ("Materials and Methods"). All molecular ions are [M+Na]<sup>+</sup>. Putative structures based on composition, tandem MS and biosynthetic knowledge. Cartoon structures are according to the Consortium for Functional Glycomics (<http://www.functionalglycomics.org>) guidelines.

**Supplemental Fig. 4. Scan Zoom MALDI-TOF Spectra of Permethylated N- and O-glycans Derived from Untreated and 4-F-GlcNAc-Treated T cells.** Zoom scan signals present at *m/z* 1835 (N-glycans) and 779 (O-glycans). N-glycomic profiles were obtained from the 35% MeCN fraction, while O-glycomic profiles were obtained from the 50% MeCN fraction (Supplementary Figure 2), both from a C<sub>18</sub> Sep-Pak column ("Materials and Methods"). All molecular ions are [M+Na]<sup>+</sup>. Putative structures based on composition, tandem MS and the literature shown. Cartoon structures are according to the Consortium for Functional Glycomics (<http://www.functionalglycomics.org>) guidelines. Signals at *m/z* 1823 in (a) and (b) and at *m/z* 767 in (c) and (d) correspond to the theoretical incorporation of 4-F-GlcNAc.

**Supplemental Fig. 5. Effect of GlcNAc Variants on Galectin-1 Ligands on sLe<sup>x</sup> (+) KG1a and T cells.** (a and c) Representative flow cytometric histograms of KG1a and T cells treated with the indicated GlcNAc analogs. After treatment, cells were stained with Gal-1hFc (10 ug/ml) along with APC-goat anti-human IgG secondary (gray histogram= staining with hFc control; black histogram = staining of untreated cells with Gal-1hFc; dotted histogram= staining of sugar-treated cells with Gal-1hFc). KG1a cells were incubated with or without GlcNAc variants (0.05mM) for 48hrs before being harvested and stained. T cells were incubated with GlcNAc variants (0.05mM) for 48hrs, except for peracetylated 4-F-GlcNAc, which was incubated at 0.015mM for 38 hrs. (b and d) Quantitation of Gal-1hFc binding based on the flow cytometric results shown in (a and c). The mean fluorescent intensity of Gal-1hFc binding to treated cells was normalized to untreated cells, which was set at 100%. Graphed are data from experiments performed in triplicate on two different occasions with the standard error of the mean (SEM) indicated. \*\*, p<0.01, statistically significant compared with untreated control, one-way ANOVA with Dunnett's post hoc test.

# Supplemental Figure 1

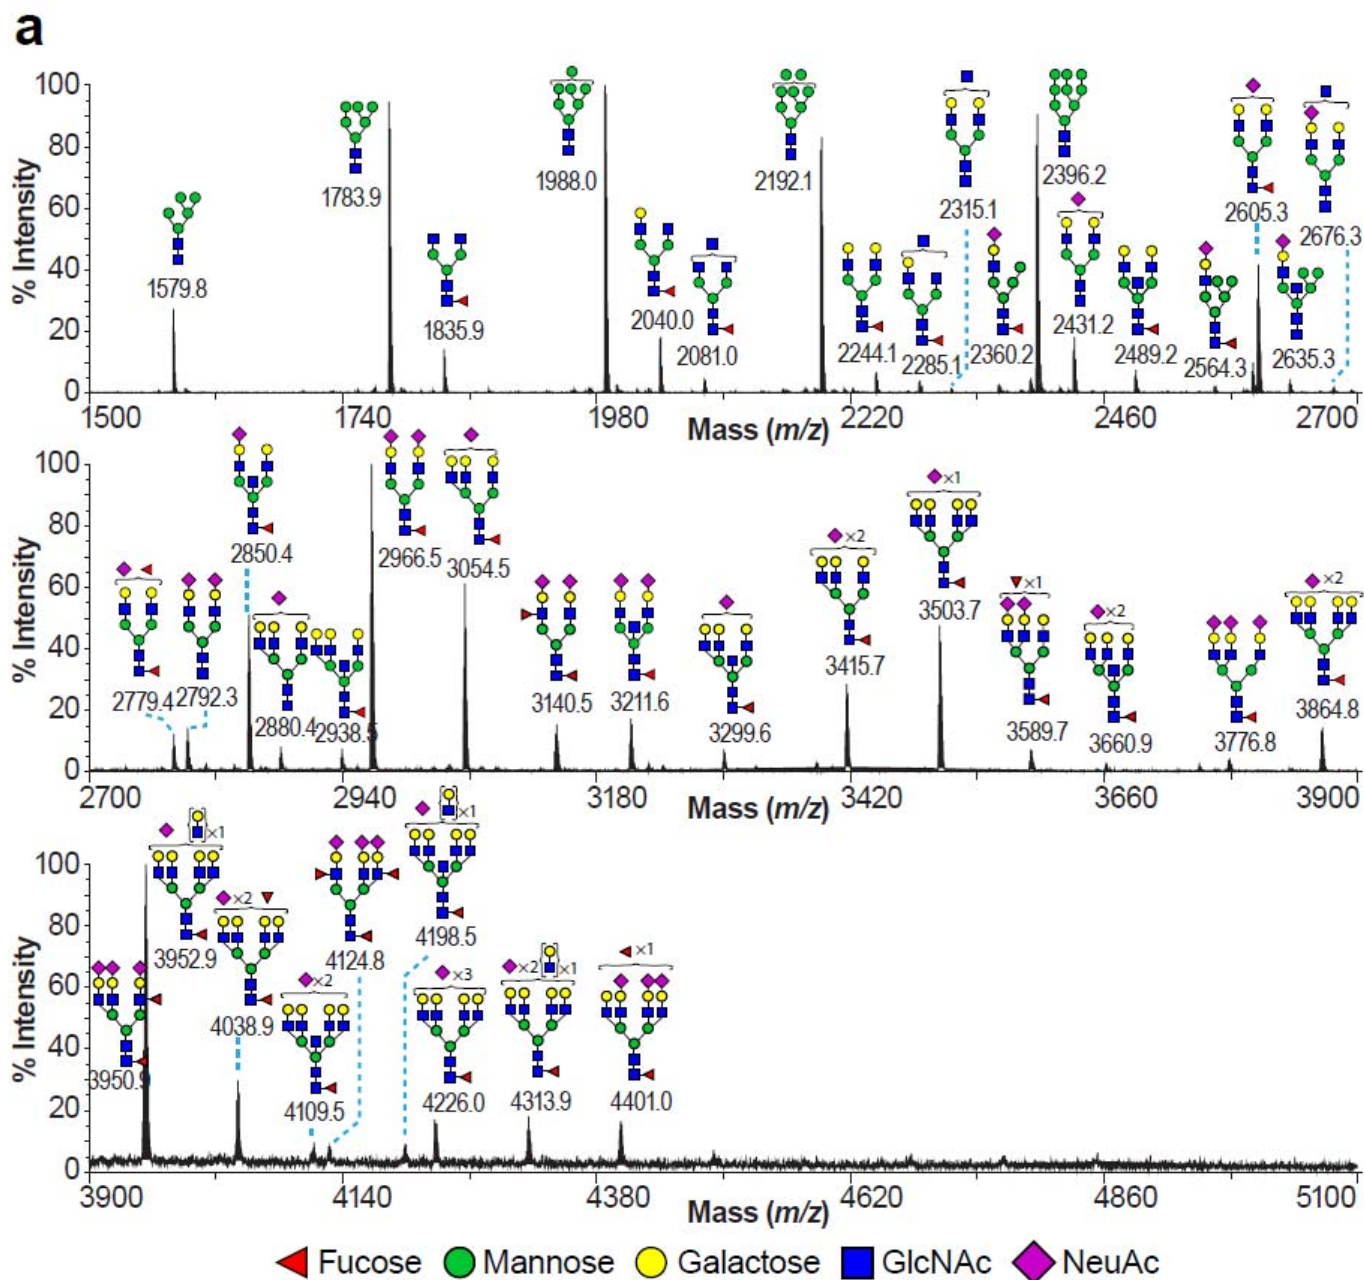

# Supplemental Figure 1

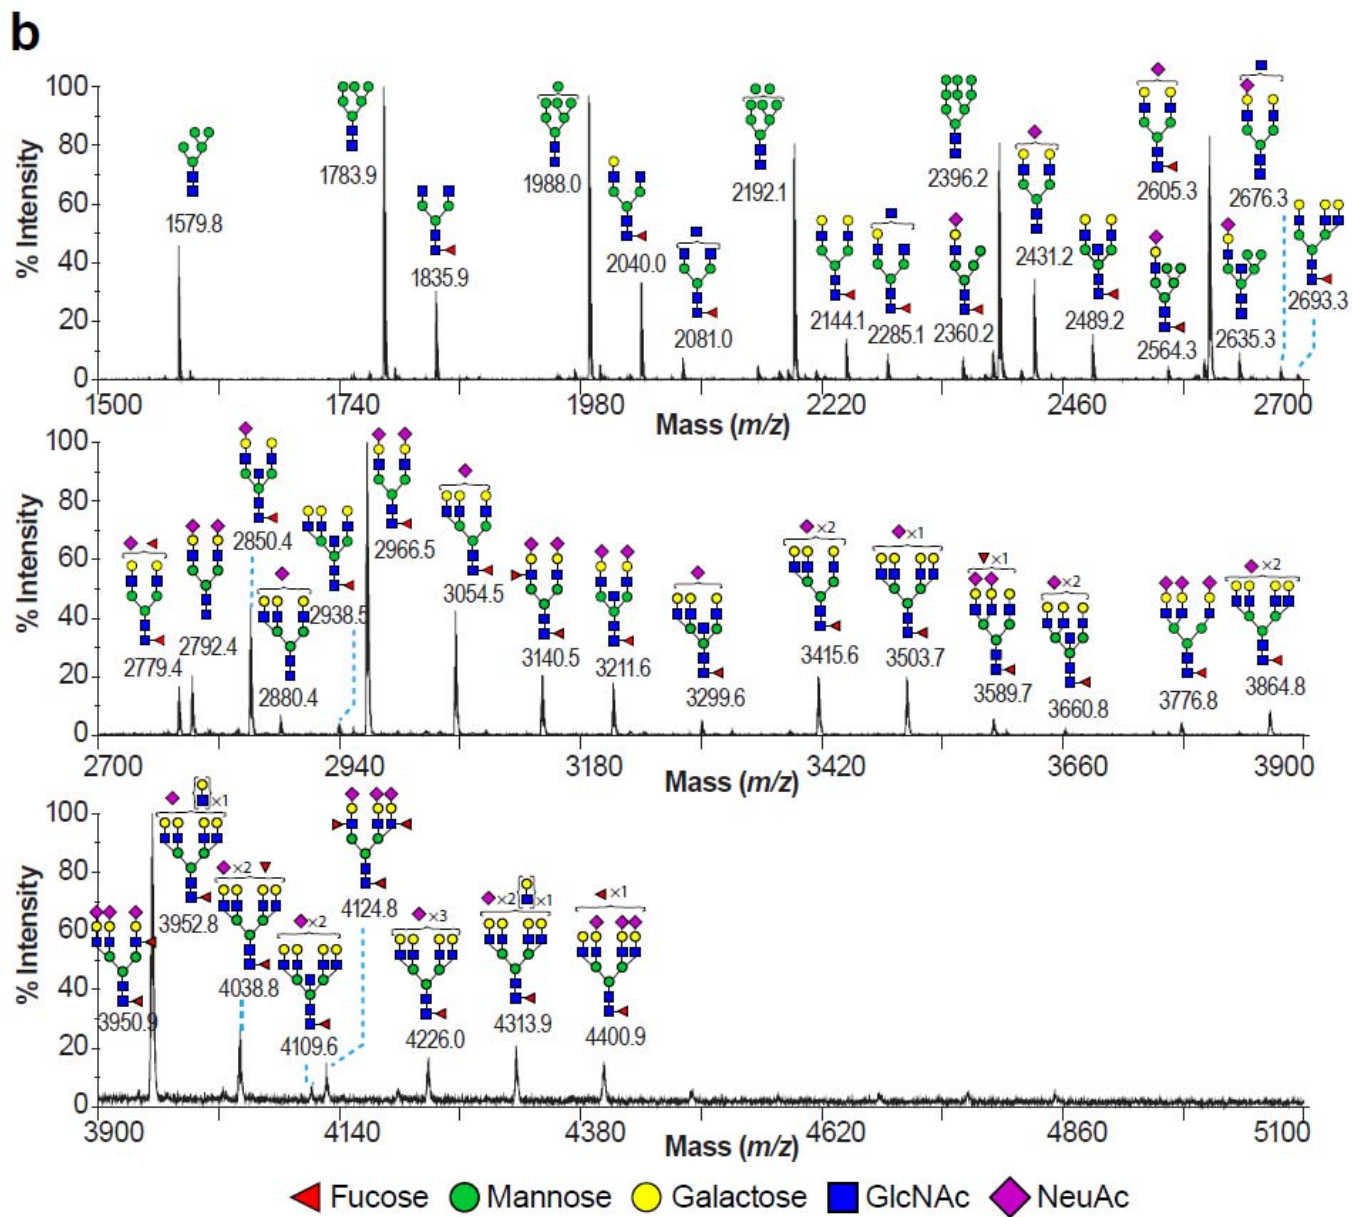

Supplemental Figure 1

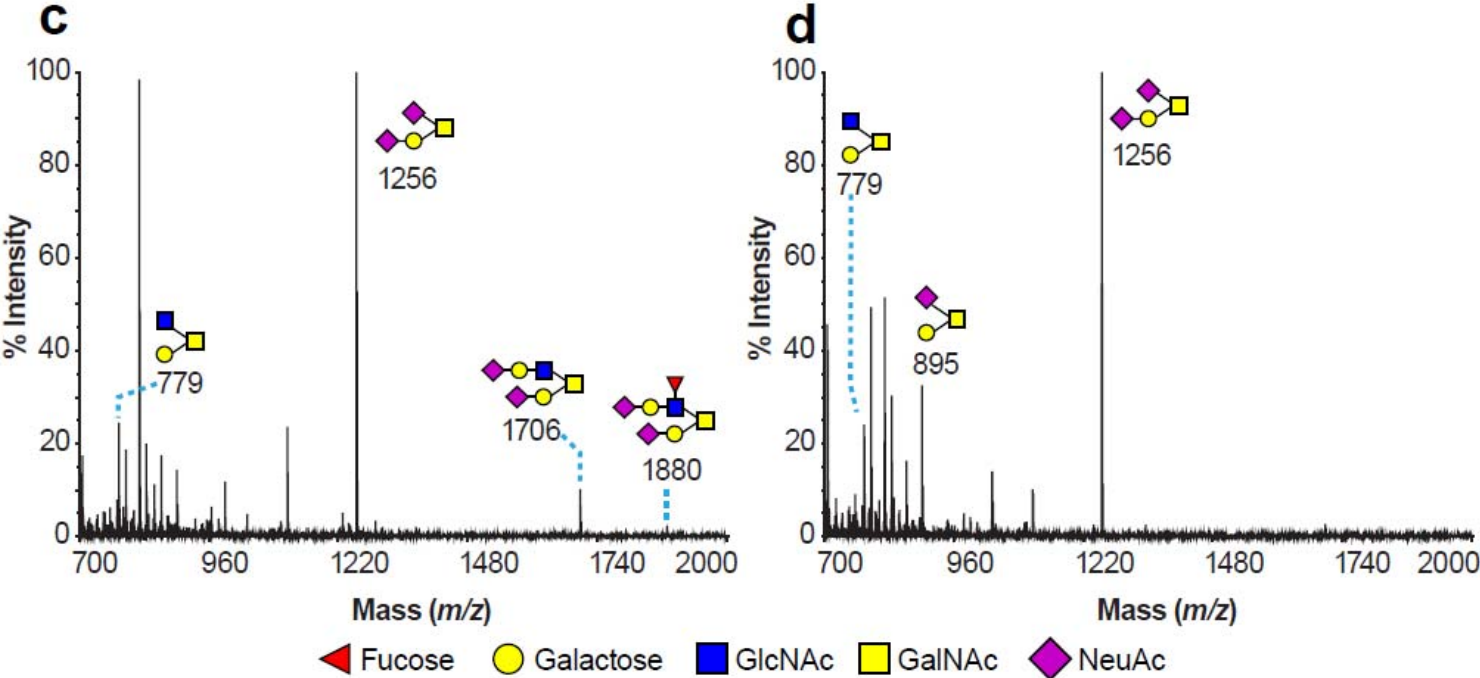

# Supplemental Figure 2

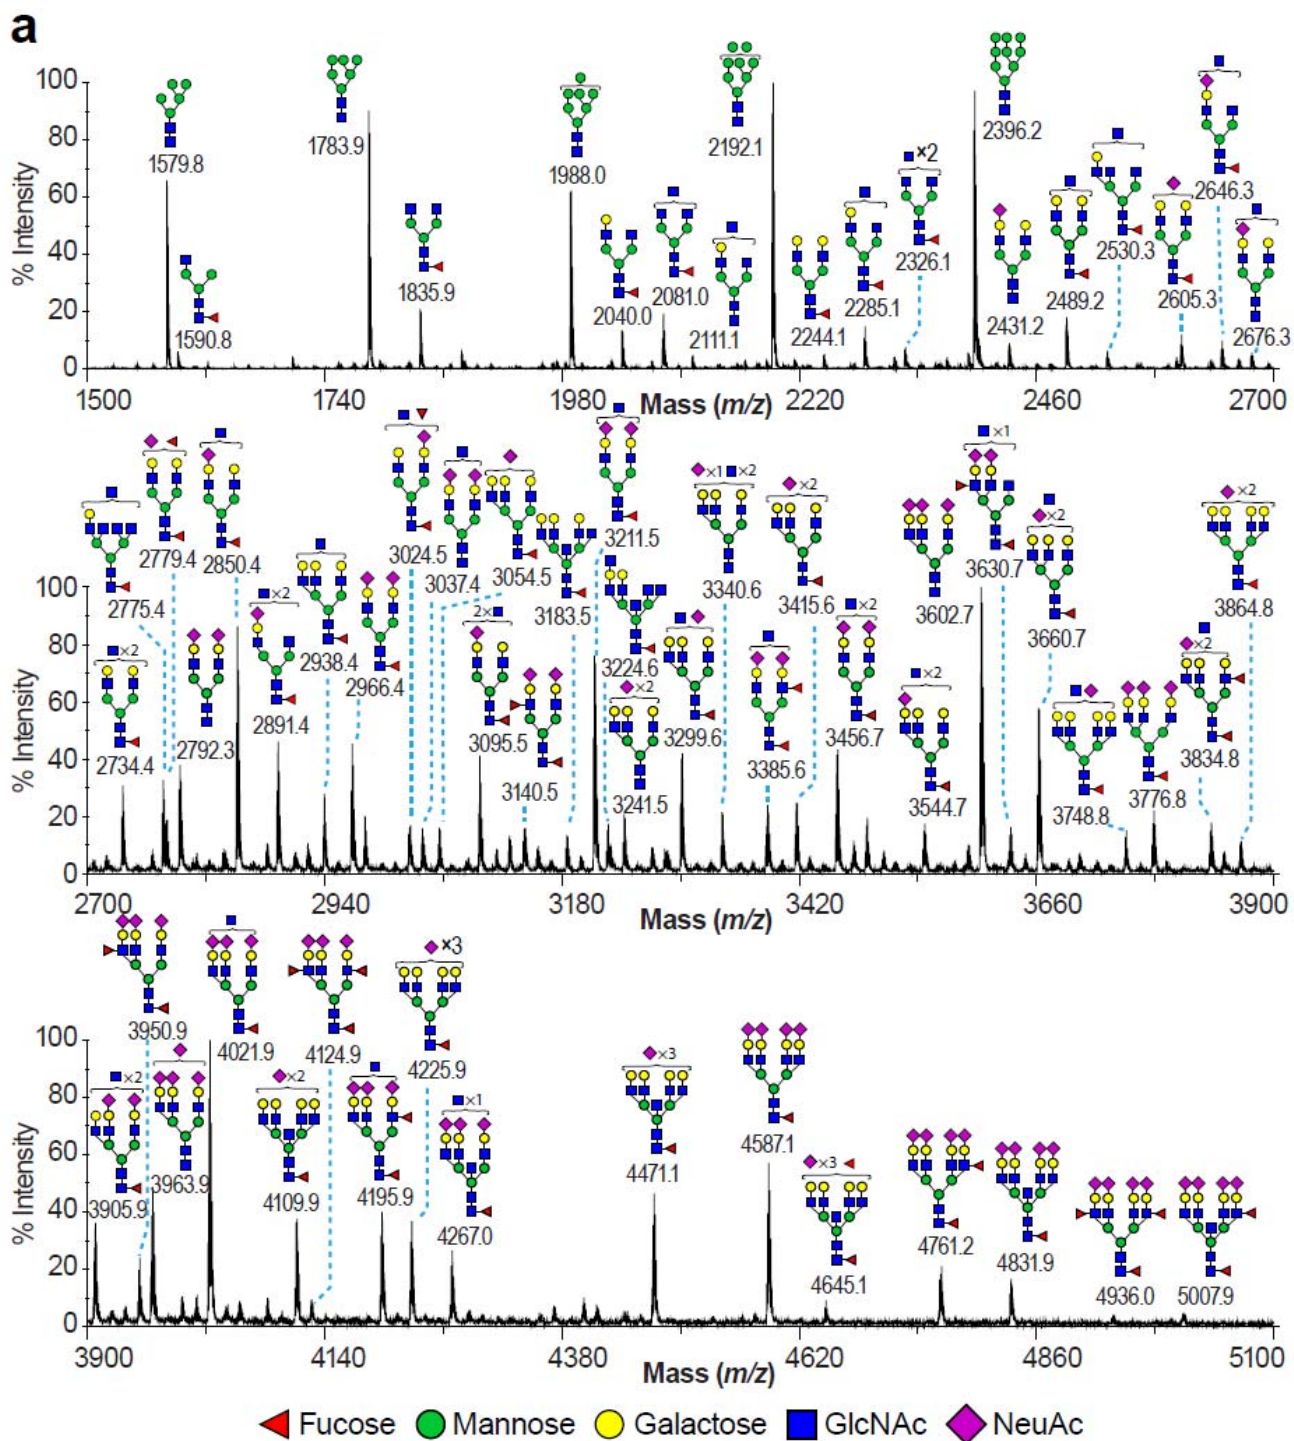

# Supplemental Figure 2

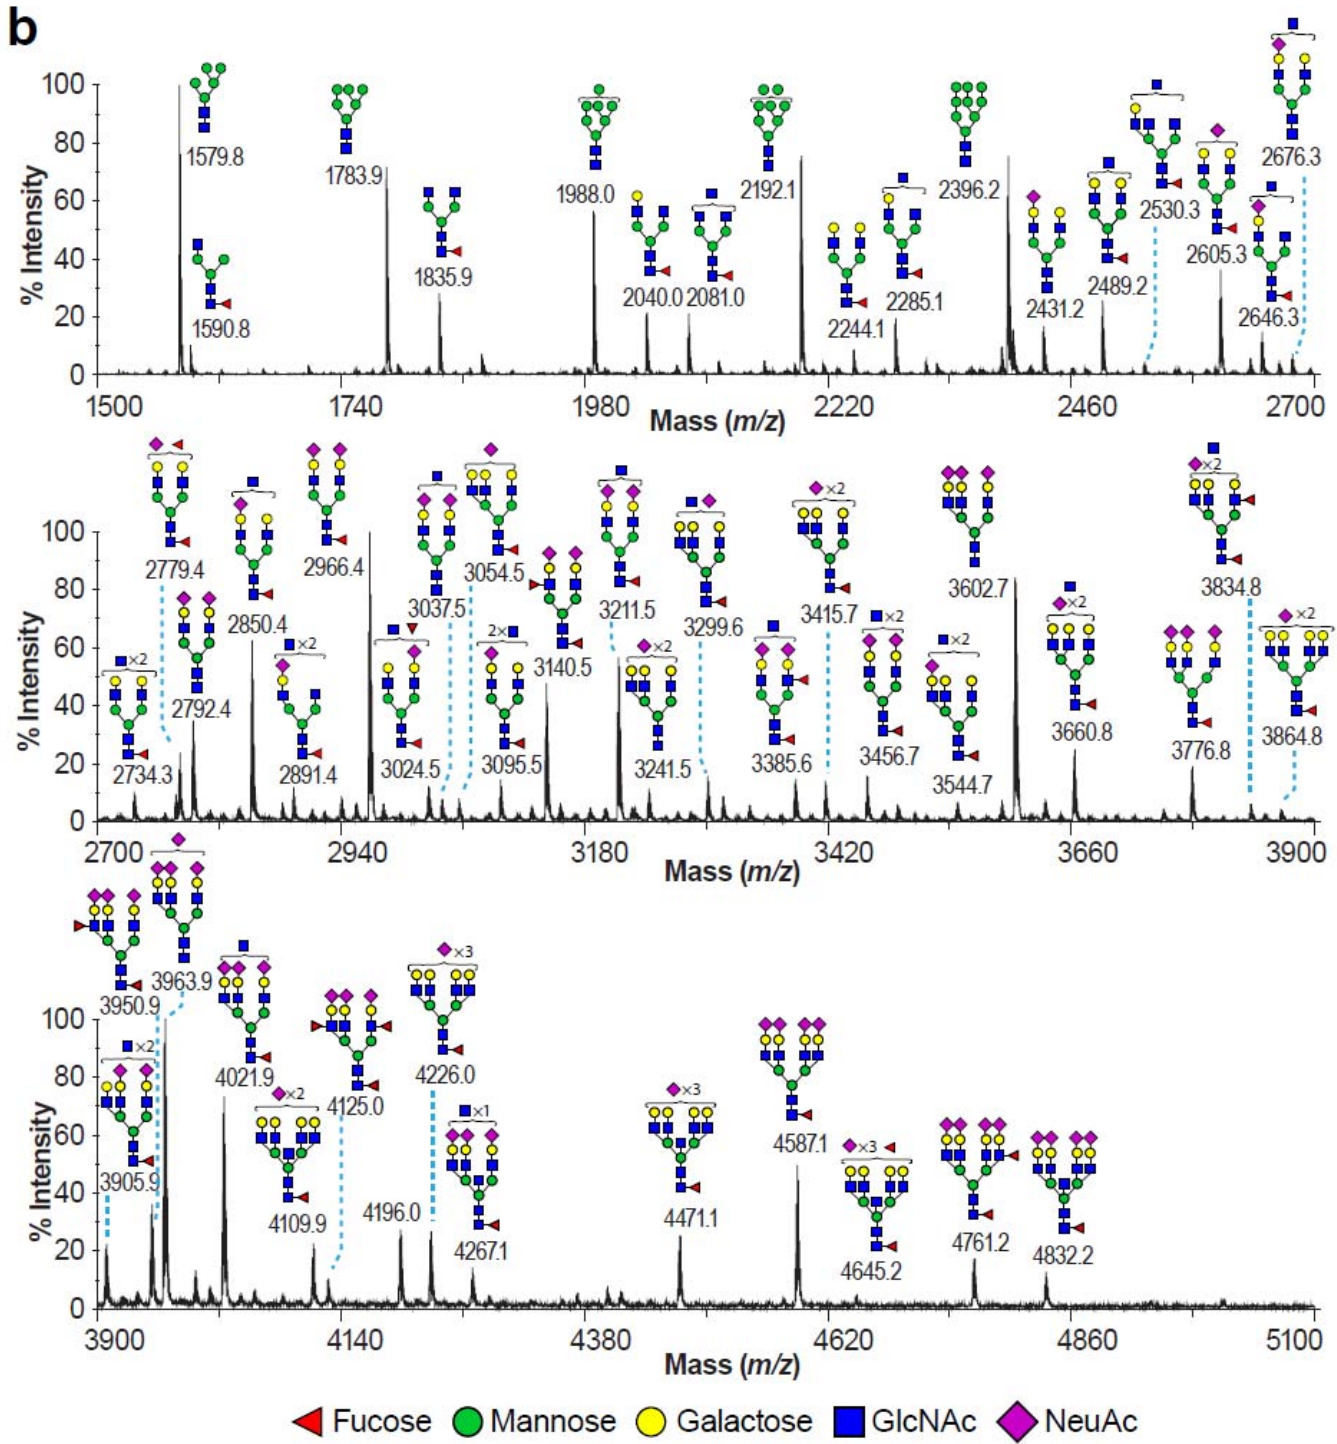

# Supplemental Figure 2

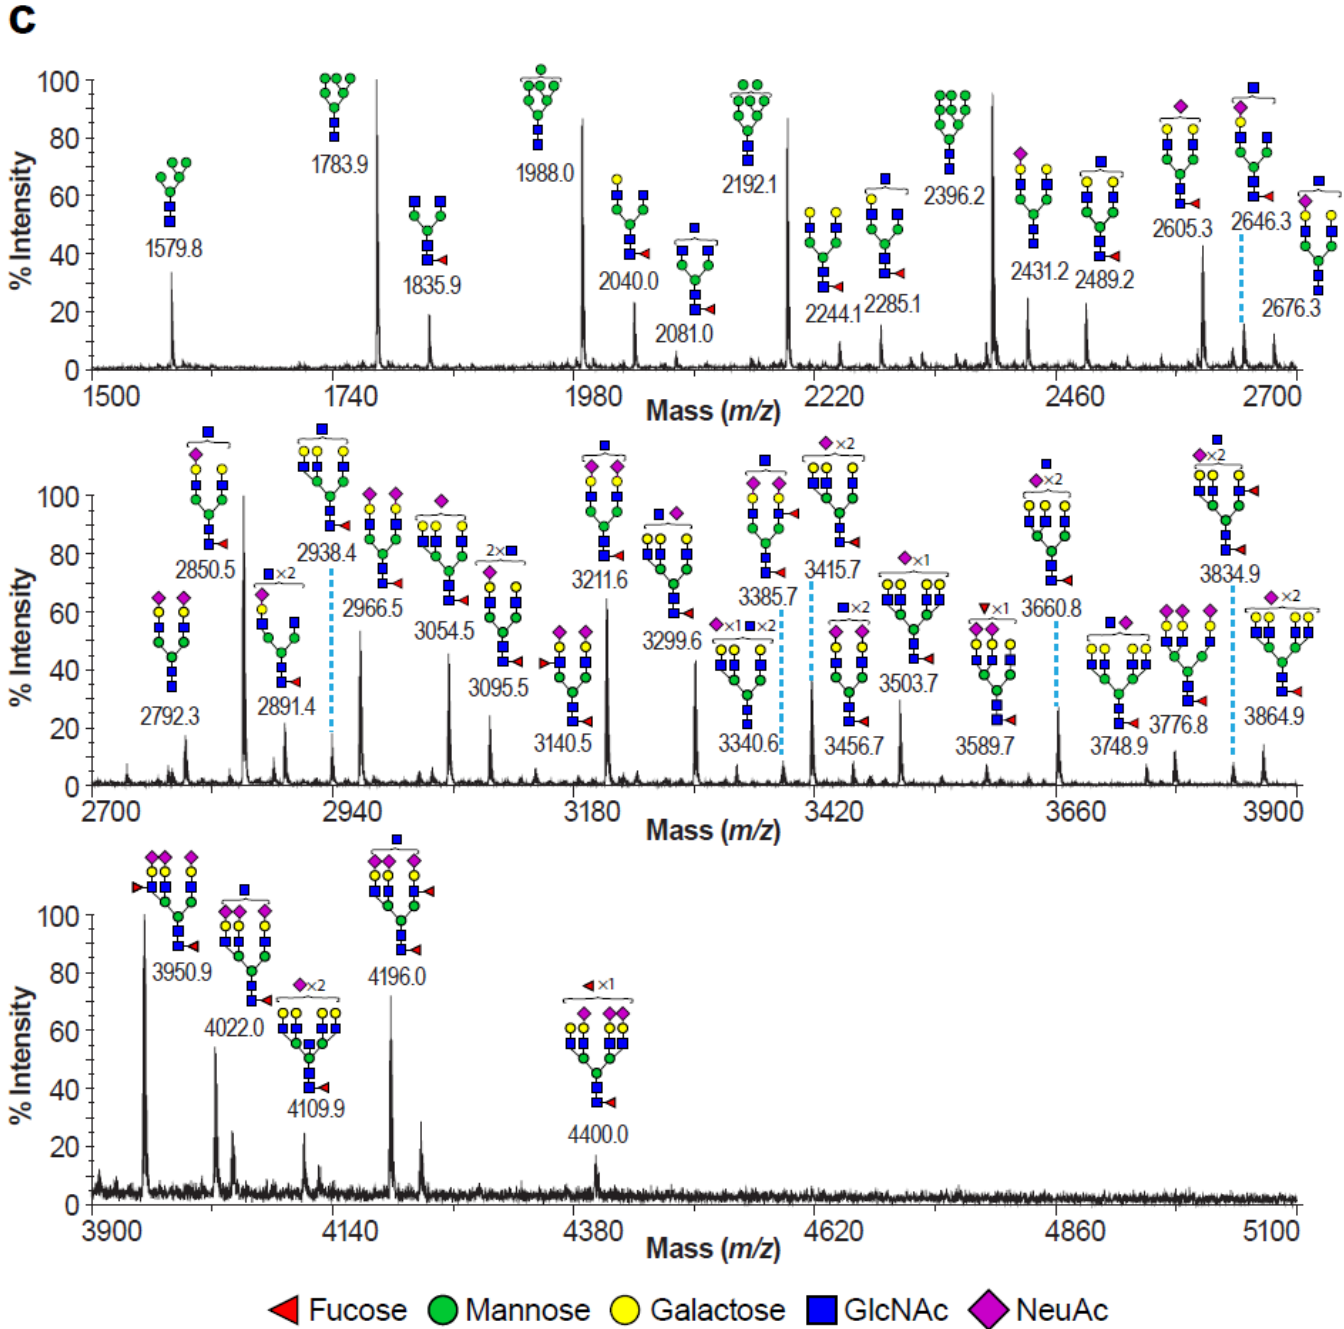

# Supplemental Figure 2

**d**

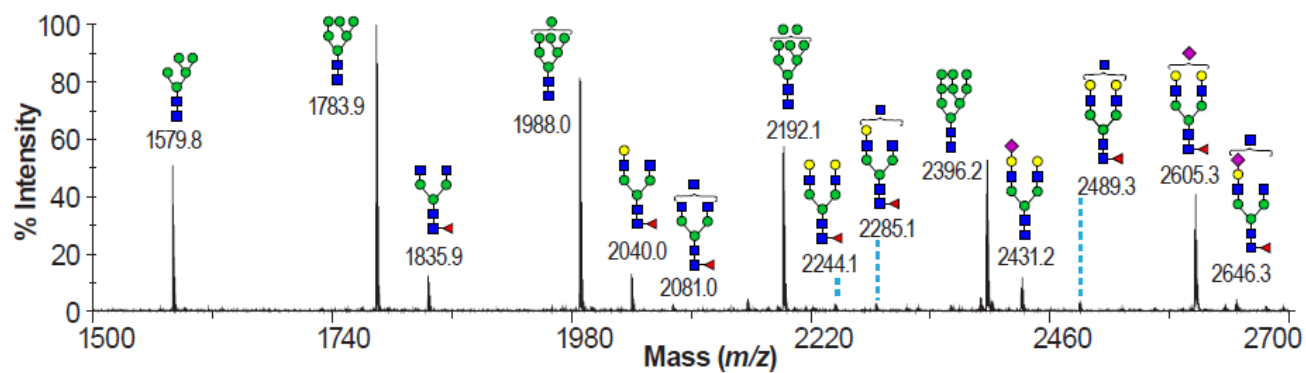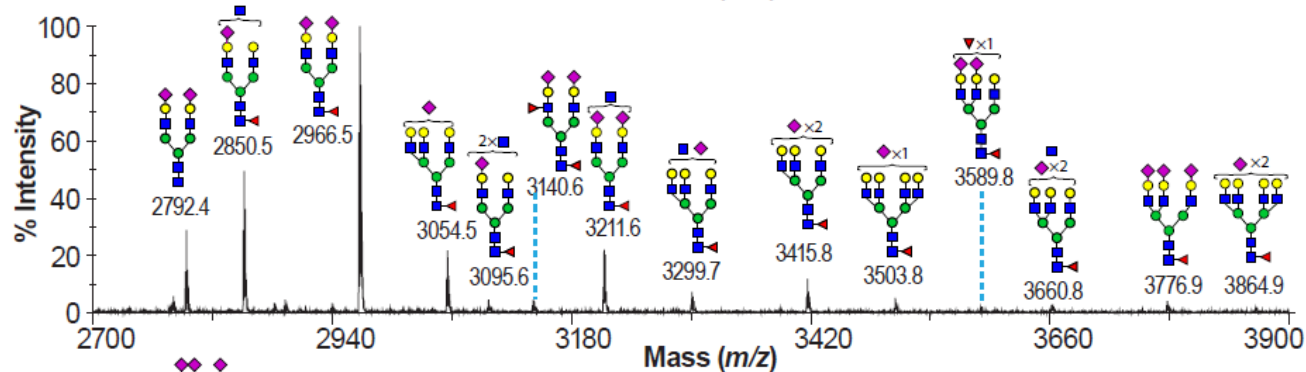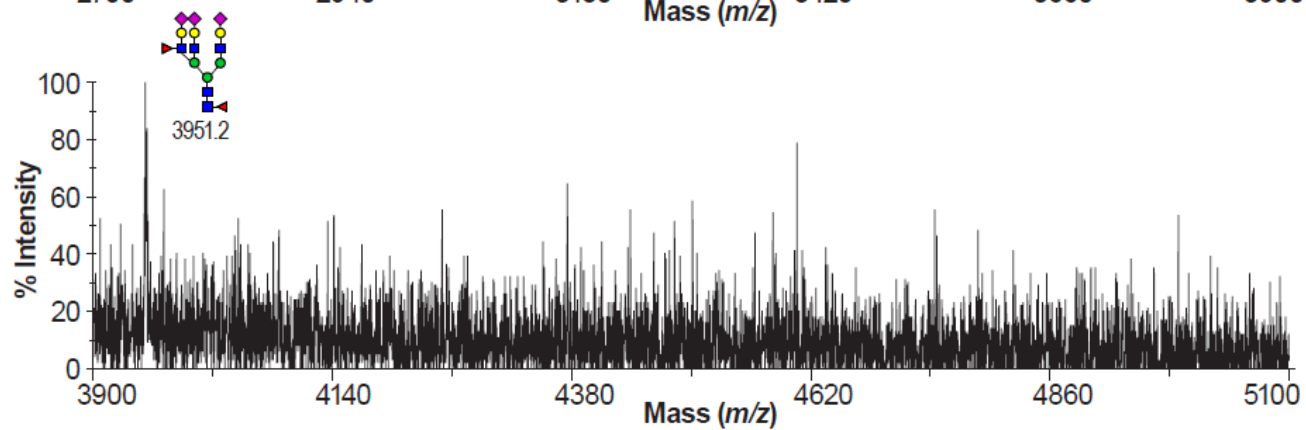

◀ Fucose   
 ● Mannose   
 ● Galactose   
 ■ GlcNAc   
 ◆ NeuAc



# Supplemental Figure 3

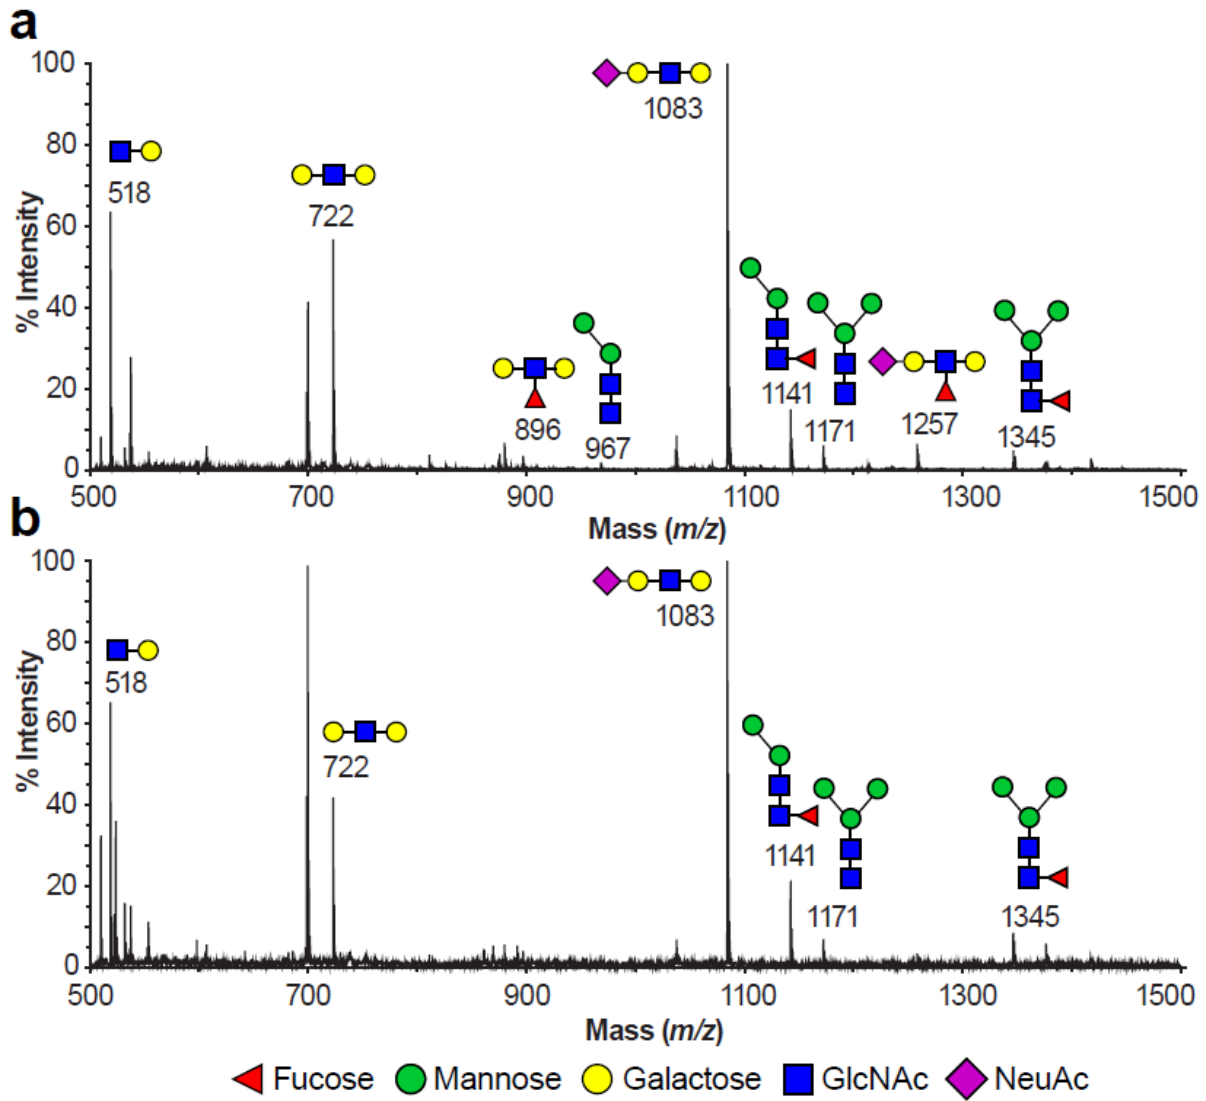

# Supplemental Figure 4

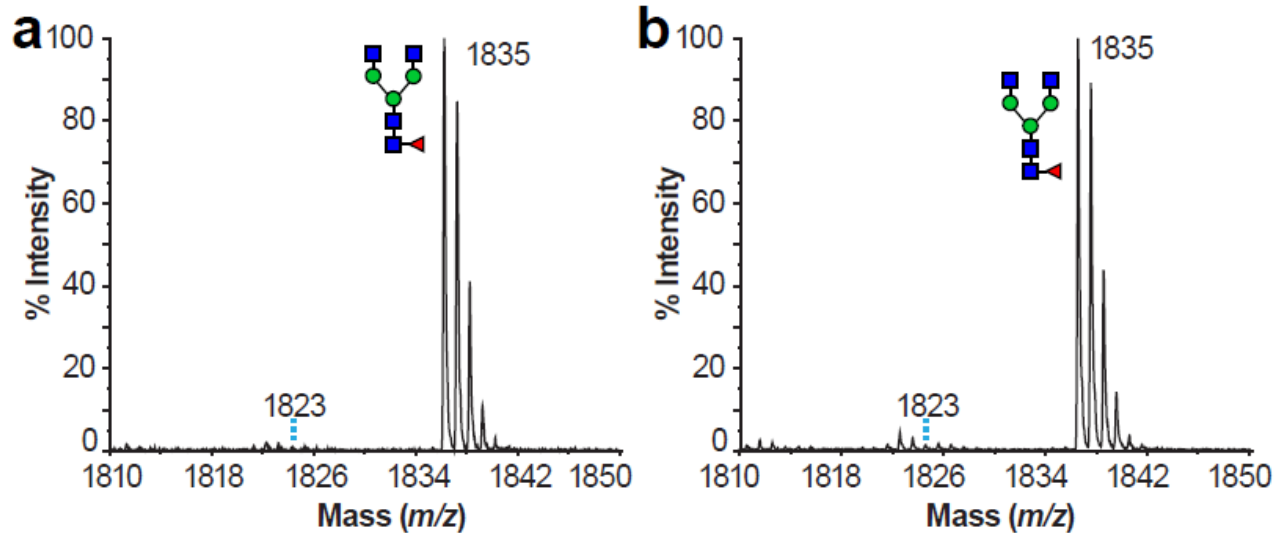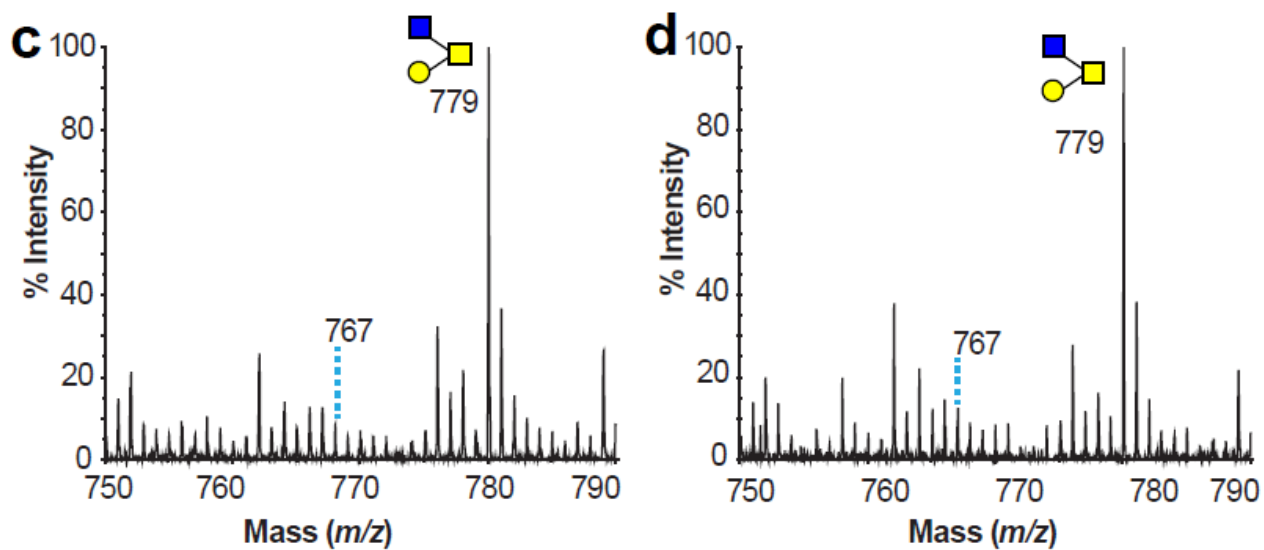

◀ Fucose   ● Mannose   ● Galactose   ■ GlcNAc   ■ GalNAc

Supplemental Figure 5

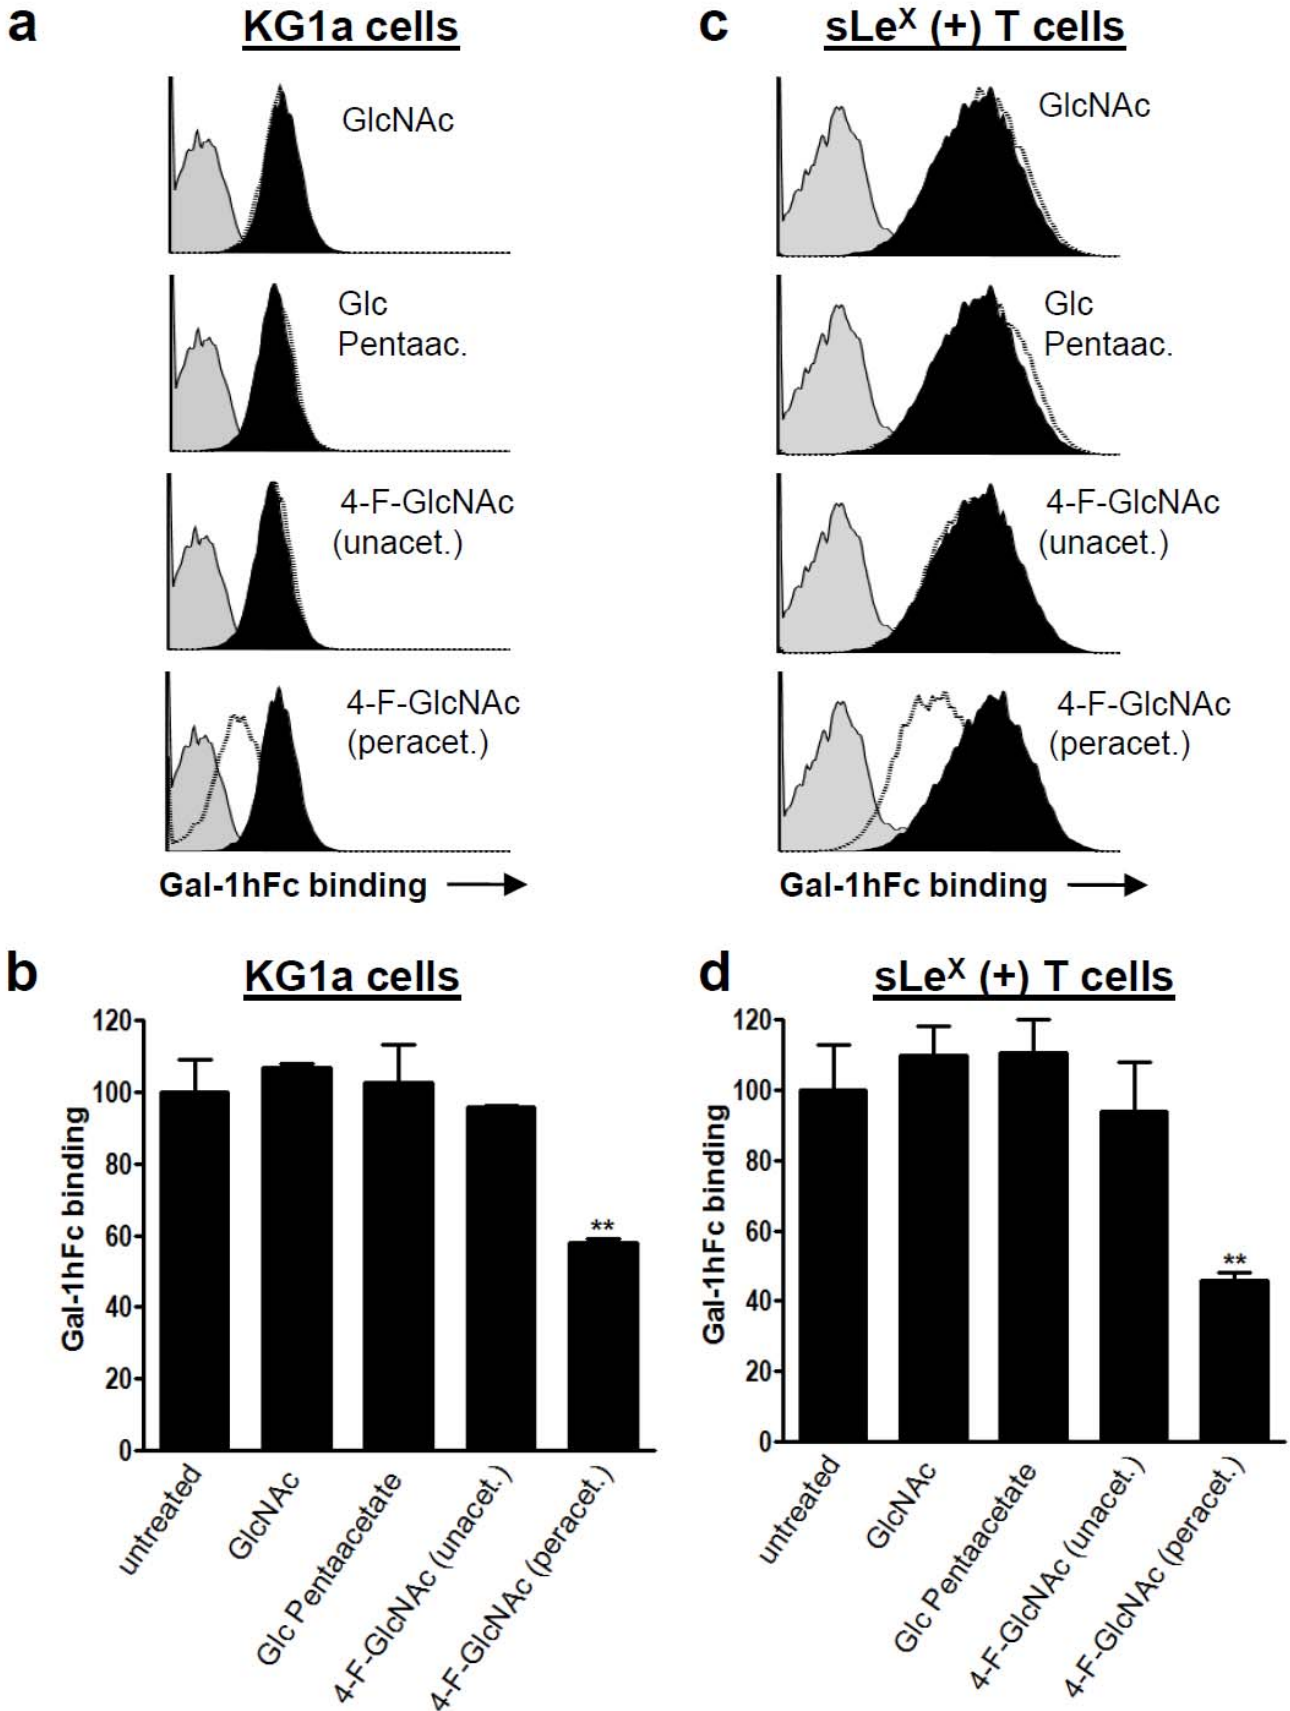

**Supplemental Table 1.**

Compositional assignments and masses of singly charged sodiated molecular ions  $[M+Na]^+$ , observed in MALDI-TOF MS spectra of permethylated *N*-glycans derived from the untreated and 4-F-GlcNAc treated KG1a cells.

| Composition                                                              | Calculated mass ( <i>m/z</i> ) | Detected Mass ( <i>m/z</i> ) |                 |
|--------------------------------------------------------------------------|--------------------------------|------------------------------|-----------------|
|                                                                          |                                | Untreated KG1a               | 4-F-GlcNAc KG1a |
| Hex <sub>5</sub> GlcNAc <sub>2</sub>                                     | 1579.8                         | 1579.8                       | 1579.8          |
| Fuc <sub>1</sub> Hex <sub>3</sub> HexNAc <sub>3</sub>                    | 1590.8                         | 1590.8                       | 1590.8          |
| Hex <sub>6</sub> GlcNAc <sub>2</sub>                                     | 1783.9                         | 1783.9                       | 1783.9          |
| Fuc <sub>1</sub> Hex <sub>3</sub> HexNAc <sub>4</sub>                    | 1835.9                         | 1835.9                       | 1835.9          |
| Hex <sub>7</sub> GlcNAc <sub>2</sub>                                     | 1988.0                         | 1988.0                       | 1988.0          |
| Fuc <sub>1</sub> Hex <sub>4</sub> HexNAc <sub>4</sub>                    | 2040.0                         | 2040.0                       | 2040.0          |
| Fuc <sub>1</sub> Hex <sub>3</sub> HexNAc <sub>5</sub>                    | 2081.1                         | 2081.0                       | 2081.0          |
| Hex <sub>8</sub> GlcNAc <sub>2</sub>                                     | 2192.1                         | 2192.1                       | 2192.1          |
| Fuc <sub>1</sub> Hex <sub>5</sub> HexNAc <sub>4</sub>                    | 2244.1                         | 2244.1                       | 2244.1          |
| Fuc <sub>1</sub> Hex <sub>4</sub> HexNAc <sub>5</sub>                    | 2285.2                         | 2285.1                       | 2285.1          |
| Hex <sub>5</sub> HexNAc <sub>5</sub>                                     | 2315.2                         | 2315.2                       | 2315.2          |
| Hex <sub>9</sub> GlcNAc <sub>2</sub>                                     | 2396.2                         | 2396.2                       | 2396.2          |
| Hex <sub>5</sub> HexNAc <sub>4</sub> NeuAc <sub>1</sub>                  | 2431.2                         | 2431.2                       | 2431.2          |
| Fuc <sub>1</sub> Hex <sub>5</sub> HexNAc <sub>5</sub>                    | 2489.3                         | 2489.2                       | 2489.2          |
| Hex <sub>10</sub> GlcNAc <sub>2</sub>                                    | 2600.3                         | 2600.3                       | 2600.3          |
| Fuc <sub>1</sub> Hex <sub>5</sub> HexNAc <sub>4</sub> NeuAc <sub>1</sub> | 2605.3                         | 2605.3                       | 2605.3          |
| Hex <sub>6</sub> HexNAc <sub>4</sub> NeuAc <sub>1</sub>                  | 2635.3                         | 2635.3                       | 2635.3          |
| Fuc <sub>2</sub> Hex <sub>5</sub> HexNAc <sub>5</sub>                    | 2663.3                         | 2663.5                       | 2663.3          |
| Hex <sub>5</sub> HexNAc <sub>5</sub> NeuAc <sub>1</sub>                  | 2676.3                         | 2676.5                       | 2676.3          |
| Fuc <sub>1</sub> Hex <sub>5</sub> HexNAc <sub>6</sub>                    | 2734.4                         | 2734.3                       | -               |
| Fuc <sub>2</sub> Hex <sub>5</sub> HexNAc <sub>4</sub> NeuAc <sub>1</sub> | 2779.4                         | 2779.3                       | 2779.3          |
| Hex <sub>5</sub> HexNAc <sub>4</sub> NeuAc <sub>2</sub>                  | 2792.4                         | 2792.3                       | 2792.3          |
| Fuc <sub>1</sub> Hex <sub>5</sub> HexNAc <sub>5</sub> NeuAc <sub>1</sub> | 2850.4                         | 2850.4                       | 2850.4          |
| Hex <sub>6</sub> HexNAc <sub>5</sub> NeuAc <sub>1</sub>                  | 2880.4                         | 2880.4                       | 2880.4          |
| Fuc <sub>1</sub> Hex <sub>6</sub> HexNAc <sub>6</sub>                    | 2938.5                         | 2938.4                       | 2938.4          |
| Fuc <sub>1</sub> Hex <sub>5</sub> HexNAc <sub>4</sub> NeuAc <sub>2</sub> | 2966.5                         | 2966.4                       | 2966.4          |
| Fuc <sub>2</sub> Hex <sub>5</sub> HexNAc <sub>5</sub> NeuAc <sub>1</sub> | 3024.5                         | 3024.5                       | 3024.5          |

|                                                                          |        |        |        |
|--------------------------------------------------------------------------|--------|--------|--------|
| Hex <sub>5</sub> HexNAC <sub>5</sub> NeuAc <sub>2</sub>                  | 3037.5 | 3037.6 | 3037.6 |
| Fuc <sub>1</sub> Hex <sub>6</sub> HexNAC <sub>5</sub> NeuAc <sub>1</sub> | 3054.5 | 3054.5 | 3054.5 |
| Fuc <sub>2</sub> Hex <sub>6</sub> HexNAC <sub>6</sub>                    | 3112.6 | 3112.7 | -      |
| Hex <sub>6</sub> HexNAC <sub>6</sub> NeuAc <sub>1</sub>                  | 3125.6 | 3125.7 | -      |
| Fuc <sub>2</sub> Hex <sub>5</sub> HexNAC <sub>4</sub> NeuAc <sub>2</sub> | 3140.6 | 3140.5 | 3140.5 |
| Fuc <sub>1</sub> Hex <sub>5</sub> HexNAC <sub>5</sub> NeuAc <sub>2</sub> | 3211.6 | 3211.5 | 3211.6 |
| Hex <sub>6</sub> HexNAC <sub>5</sub> NeuAc <sub>2</sub>                  | 3241.6 | 3241.5 | 3241.6 |
| Fuc <sub>1</sub> Hex <sub>6</sub> HexNAC <sub>6</sub> NeuAc <sub>1</sub> | 3299.7 | 3299.6 | 3299.6 |
| Fuc <sub>3</sub> Hex <sub>5</sub> HexNAC <sub>4</sub> NeuAc <sub>2</sub> | 3314.7 | -      | 3314.6 |
| Fuc <sub>2</sub> Hex <sub>5</sub> HexNAC <sub>5</sub> NeuAc <sub>2</sub> | 3385.7 | 3385.6 | 3385.6 |
| Fuc <sub>1</sub> Hex <sub>7</sub> HexNAC <sub>7</sub>                    | 3387.7 | 3387.6 | 3387.6 |
| Fuc <sub>1</sub> Hex <sub>6</sub> HexNAC <sub>5</sub> NeuAc <sub>2</sub> | 3415.7 | 3415.6 | 3415.6 |
| Fuc <sub>2</sub> Hex <sub>6</sub> HexNAC <sub>6</sub> NeuAc <sub>1</sub> | 3473.7 | 3473.7 | -      |
| Hex <sub>6</sub> HexNAC <sub>6</sub> NeuAc <sub>2</sub>                  | 3486.7 | 3486.6 | -      |
| Fuc <sub>1</sub> Hex <sub>7</sub> HexNAC <sub>6</sub> NeuAc <sub>1</sub> | 3503.8 | 3503.7 | 3503.7 |
| Hex <sub>6</sub> HexNAC <sub>5</sub> NeuAc <sub>3</sub>                  | 3602.8 | 3602.7 | 3602.7 |
| Fuc <sub>1</sub> Hex <sub>6</sub> HexNAC <sub>6</sub> NeuAc <sub>2</sub> | 3660.8 | 3660.7 | 3660.7 |
| Fuc <sub>1</sub> Hex <sub>7</sub> HexNAC <sub>7</sub> NeuAc <sub>1</sub> | 3748.9 | 3748.8 | 3748.8 |
| Fuc <sub>1</sub> Hex <sub>6</sub> HexNAC <sub>5</sub> NeuAc <sub>3</sub> | 3776.9 | 3776.7 | 3776.7 |
| Fuc <sub>2</sub> Hex <sub>6</sub> HexNAC <sub>6</sub> NeuAc <sub>2</sub> | 3834.9 | 3834.8 | 3834.8 |
| Fuc <sub>1</sub> Hex <sub>7</sub> HexNAC <sub>6</sub> NeuAc <sub>2</sub> | 3864.9 | 3864.8 | 3864.8 |
| Fuc <sub>2</sub> Hex <sub>6</sub> HexNAC <sub>5</sub> NeuAc <sub>3</sub> | 3951.0 | 3950.8 | 3950.9 |
| Fuc <sub>1</sub> Hex <sub>6</sub> HexNAC <sub>6</sub> NeuAc <sub>3</sub> | 4022.0 | 4021.8 | 4021.9 |
| Fuc <sub>1</sub> Hex <sub>7</sub> HexNAC <sub>7</sub> NeuAc <sub>2</sub> | 4110.1 | 4109.9 | 4109.9 |
| Fuc <sub>2</sub> Hex <sub>6</sub> HexNAC <sub>6</sub> NeuAc <sub>3</sub> | 4196.1 | 4195.9 | 4195.9 |
| Fuc <sub>1</sub> Hex <sub>8</sub> HexNAC <sub>8</sub> NeuAc <sub>1</sub> | 4198.1 | 4197.9 | 4197.9 |
| Fuc <sub>1</sub> Hex <sub>7</sub> HexNAC <sub>6</sub> NeuAc <sub>3</sub> | 4226.1 | 4225.9 | 4225.9 |
| Fuc <sub>2</sub> Hex <sub>7</sub> HexNAC <sub>7</sub> NeuAc <sub>2</sub> | 4284.1 | 4283.9 | 4283.9 |
| Fuc <sub>1</sub> Hex <sub>8</sub> HexNAC <sub>7</sub> NeuAc <sub>2</sub> | 4314.2 | 4313.9 | 4314.0 |
| Fuc <sub>2</sub> Hex <sub>7</sub> HexNAC <sub>6</sub> NeuAc <sub>3</sub> | 4400.2 | 4400.6 | 4400.0 |
| Fuc <sub>1</sub> Hex <sub>7</sub> HexNAC <sub>7</sub> NeuAc <sub>3</sub> | 4471.2 | 4471.0 | 4471.0 |
| Fuc <sub>1</sub> Hex <sub>8</sub> HexNAC <sub>8</sub> NeuAc <sub>2</sub> | 4559.3 | 4559.0 | 4559.1 |
| Fuc <sub>2</sub> Hex <sub>7</sub> HexNAC <sub>7</sub> NeuAc <sub>3</sub> | 4645.3 | 4645.8 | 4645.1 |
| Fuc <sub>1</sub> Hex <sub>8</sub> HexNAC <sub>7</sub> NeuAc <sub>3</sub> | 4675.3 | 4674.8 | 4675.2 |

|                                                                          |        |        |        |
|--------------------------------------------------------------------------|--------|--------|--------|
| Fuc <sub>1</sub> Hex <sub>9</sub> HexNAc <sub>8</sub> NeuAc <sub>2</sub> | 4763.4 | 4763.0 | 4763.0 |
| Fuc <sub>1</sub> Hex <sub>8</sub> HexNAc <sub>8</sub> NeuAc <sub>3</sub> | 4920.5 | 4920.7 | 4921.0 |

**Supplemental Table 2.**

Compositional assignments and masses of singly charged sodiated molecular ions  $[M+Na]^+$ , observed in MALDI-TOF MS spectra of permethylated N-glycans derived from the untreated and 4-F-GlcNAc treated T cells.

| Composition                                                              | Calculated mass ( <i>m/z</i> ) | Detected Mass ( <i>m/z</i> ) |                    |
|--------------------------------------------------------------------------|--------------------------------|------------------------------|--------------------|
|                                                                          |                                | Untreated T Cells            | 4-F-GlcNAc T Cells |
| Hex <sub>5</sub> GlcNAc <sub>2</sub>                                     | 1579.8                         | 1579.8                       | 1579.8             |
| Hex <sub>6</sub> GlcNAc <sub>2</sub>                                     | 1783.9                         | 1783.9                       | 1783.9             |
| Fuc <sub>1</sub> Hex <sub>3</sub> HexNAc <sub>4</sub>                    | 1835.9                         | 1835.9                       | 1835.9             |
| Hex <sub>7</sub> GlcNAc <sub>2</sub>                                     | 1988.0                         | 1988.0                       | 1988.0             |
| Fuc <sub>1</sub> Hex <sub>4</sub> HexNAc <sub>4</sub>                    | 2040.0                         | 2040.0                       | 2040.0             |
| Fuc <sub>1</sub> Hex <sub>3</sub> HexNAc <sub>5</sub>                    | 2081.1                         | 2081.0                       | 2081.0             |
| Hex <sub>8</sub> GlcNAc <sub>2</sub>                                     | 2192.1                         | 2192.1                       | 2192.1             |
| Fuc <sub>1</sub> Hex <sub>5</sub> HexNAc <sub>4</sub>                    | 2244.1                         | 2244.1                       | 2244.1             |
| Fuc <sub>1</sub> Hex <sub>4</sub> HexNAc <sub>5</sub>                    | 2285.2                         | 2285.1                       | 2285.1             |
| Hex <sub>5</sub> HexNAc <sub>5</sub>                                     | 2315.2                         | 2315.1                       | 2315.1             |
| Hex <sub>9</sub> GlcNAc <sub>2</sub>                                     | 2396.2                         | 2396.2                       | 2396.2             |
| Hex <sub>5</sub> HexNAc <sub>4</sub> NeuAc <sub>1</sub>                  | 2431.2                         | 2431.2                       | 2431.2             |
| Fuc <sub>1</sub> Hex <sub>5</sub> HexNAc <sub>5</sub>                    | 2489.3                         | 2489.2                       | 2489.2             |
| Fuc <sub>1</sub> Hex <sub>6</sub> HexNAc <sub>3</sub> NeuAc <sub>1</sub> | 2564.3                         | 2564.3                       | 2564.3             |
| Fuc <sub>1</sub> Hex <sub>5</sub> HexNAc <sub>4</sub> NeuAc <sub>1</sub> | 2605.3                         | 2605.3                       | 2605.3             |
| Hex <sub>6</sub> HexNAc <sub>4</sub> NeuAc <sub>1</sub>                  | 2635.3                         | 2635.3                       | 2635.2             |
| Hex <sub>5</sub> HexNAc <sub>5</sub> NeuAc <sub>1</sub>                  | 2676.3                         | 2676.3                       | 2676.3             |
| Fuc <sub>2</sub> Hex <sub>5</sub> HexNAc <sub>4</sub> NeuAc <sub>1</sub> | 2779.4                         | 2779.4                       | 2779.4             |
| Hex <sub>5</sub> HexNAc <sub>4</sub> NeuAc <sub>2</sub>                  | 2792.4                         | 2792.4                       | 2792.4             |
| Fuc <sub>1</sub> Hex <sub>5</sub> HexNAc <sub>5</sub> NeuAc <sub>1</sub> | 2850.4                         | 2850.4                       | 2850.4             |
| Hex <sub>6</sub> HexNAc <sub>5</sub> NeuAc <sub>1</sub>                  | 2880.4                         | 2880.4                       | 2880.4             |
| Fuc <sub>1</sub> Hex <sub>6</sub> HexNAc <sub>6</sub>                    | 2938.5                         | 2938.5                       | 2938.5             |
| Fuc <sub>1</sub> Hex <sub>5</sub> HexNAc <sub>4</sub> NeuAc <sub>2</sub> | 2966.5                         | 2966.5                       | 2966.5             |
| Fuc <sub>1</sub> Hex <sub>6</sub> HexNAc <sub>5</sub> NeuAc <sub>1</sub> | 3054.5                         | 3054.5                       | 3054.5             |
| Fuc <sub>2</sub> Hex <sub>5</sub> HexNAc <sub>4</sub> NeuAc <sub>2</sub> | 3140.6                         | 3140.5                       | 3140.5             |
| Fuc <sub>1</sub> Hex <sub>5</sub> HexNAc <sub>5</sub> NeuAc <sub>2</sub> | 3211.6                         | 3211.6                       | 3211.6             |
| Fuc <sub>1</sub> Hex <sub>6</sub> HexNAc <sub>6</sub> NeuAc <sub>1</sub> | 3299.7                         | 3299.6                       | 3299.6             |

|                                                                          |        |        |        |
|--------------------------------------------------------------------------|--------|--------|--------|
| Fuc <sub>1</sub> Hex <sub>6</sub> HexNAc <sub>5</sub> NeuAc <sub>2</sub> | 3415.7 | 3415.7 | 3415.6 |
| Fuc <sub>1</sub> Hex <sub>7</sub> HexNAc <sub>6</sub> NeuAc <sub>1</sub> | 3503.8 | 3503.7 | 3503.7 |
| Fuc <sub>2</sub> Hex <sub>6</sub> HexNAc <sub>5</sub> NeuAc <sub>2</sub> | 3589.8 | 3589.7 | 3589.7 |
| Fuc <sub>1</sub> Hex <sub>6</sub> HexNAc <sub>6</sub> NeuAc <sub>2</sub> | 3660.8 | 3660.9 | 3660.8 |
| Fuc <sub>1</sub> Hex <sub>6</sub> HexNAc <sub>5</sub> NeuAc <sub>3</sub> | 3776.9 | 3776.8 | 3776.8 |
| Fuc <sub>1</sub> Hex <sub>7</sub> HexNAc <sub>6</sub> NeuAc <sub>2</sub> | 3864.9 | 3864.8 | 3864.8 |
| Fuc <sub>2</sub> Hex <sub>6</sub> HexNAc <sub>5</sub> NeuAc <sub>3</sub> | 3951.0 | 3950.9 | 3950.9 |
| Fuc <sub>1</sub> Hex <sub>8</sub> HexNAc <sub>7</sub> NeuAc <sub>1</sub> | 3953.0 | 3952.9 | 3952.9 |
| Fuc <sub>2</sub> Hex <sub>7</sub> HexNAc <sub>6</sub> NeuAc <sub>2</sub> | 4039.0 | 4038.8 | 4038.8 |
| Fuc <sub>1</sub> Hex <sub>7</sub> HexNAc <sub>7</sub> NeuAc <sub>2</sub> | 4110.1 | 4109.5 | 4109.6 |
| Fuc <sub>2</sub> Hex <sub>6</sub> HexNAc <sub>5</sub> NeuAc <sub>3</sub> | 4125.1 | 4124.8 | 4124.8 |
| Fuc <sub>1</sub> Hex <sub>8</sub> HexNAc <sub>8</sub> NeuAc <sub>1</sub> | 4198.1 | 4198.5 | -      |
| Fuc <sub>1</sub> Hex <sub>7</sub> HexNAc <sub>6</sub> NeuAc <sub>3</sub> | 4226.1 | 4226.0 | 4226.0 |
| Fuc <sub>1</sub> Hex <sub>8</sub> HexNAc <sub>7</sub> NeuAc <sub>2</sub> | 4314.2 | 4313.9 | 4313.9 |
| Fuc <sub>2</sub> Hex <sub>7</sub> HexNAc <sub>6</sub> NeuAc <sub>3</sub> | 4400.2 | 4401.0 | 4400.9 |



**Supplemental Table 3.**

**GC-MS Linkage Analyses of Partially Methylated Alditol Acetates (PMAA) of KG1a and T cells Obtained after Peptide *N*-glycosidase F Digestion on Non-desialylated and Desialylated Samples.**

| Characteristic Fragment Ion <sup>a,b</sup>                              | Assignment | Relative Abundance <sup>c</sup> , %    |                                           |                                        |                                           |
|-------------------------------------------------------------------------|------------|----------------------------------------|-------------------------------------------|----------------------------------------|-------------------------------------------|
|                                                                         |            | Non-Desialylated                       |                                           | Desialylated                           |                                           |
|                                                                         |            | <u>KG1a</u><br>Untreated<br>4-F-GlcNAc | <u>T cells</u><br>Untreated<br>4-F-GlcNAc | <u>KG1a</u><br>Untreated<br>4-F-GlcNAc | <u>T cells</u><br>Untreated<br>4-F-GlcNAc |
| 102, 115, 118, 131, 162, 175                                            | t-Fuc      | 27.9                                   | 54.5                                      | 61.3                                   | 92.0                                      |
|                                                                         |            | 50.3                                   | 48.5                                      | 64.3                                   | 36.3                                      |
| 102, 118, 129, 145, 161, 162, 205                                       | t-Man      | 115.3                                  | 84.4                                      | 103.9                                  | 163.1                                     |
|                                                                         |            | 135.3                                  | 82.1                                      | 77.1                                   | 75.9                                      |
| 102, 118, 129, 145, 161, 162, 205                                       | t-Gal      | 25.6                                   | 41.5                                      | 130.3                                  | 211.6                                     |
|                                                                         |            | 25.4                                   | 31.1                                      | 62.6                                   | 88.5                                      |
| 100, 101, 129, 130, 161, 190, 205                                       | 2-Man      | 100.0                                  | 100.0                                     | 100.0                                  | 100.0                                     |
|                                                                         |            | 100.0                                  | 100.0                                     | 100.0                                  | 100.0                                     |
| 118, 129, 143, 161, 174, 190, 203, 217, 234, 245, 277                   | 3-Gal      | 40.6                                   | 29.3                                      | 29.6                                   | 30.4                                      |
|                                                                         |            | 32.9                                   | 21.4                                      | 6.0                                    | 19.4                                      |
| 99, 102, 118, 129, 159, 162, 173, 189, 233                              | 6-Gal      | 9.8                                    | 23.7                                      | 0.0                                    | 0.0                                       |
|                                                                         |            | 11.5                                   | 21.9                                      | 0.0                                    | 0.0                                       |
| 113, 130, 173 <sup>b</sup> , 190 <sup>b</sup> , 233 <sup>b</sup>        | 2,4-Man    | 10.8                                   | 10.4                                      | 17.5                                   | 19.1                                      |
|                                                                         |            | 7.8                                    | 6.6                                       | 2.8                                    | 9.4                                       |
| 99, 100, 129, 130 <sup>b</sup> , 189, 190 <sup>b</sup>                  | 2,6-Man    | 8.3                                    | 10.2                                      | 15.7                                   | 13.8                                      |
|                                                                         |            | 6.3                                    | 6.5                                       | 4.0                                    | 10.1                                      |
| 118 <sup>b</sup> , 129, 139, 143, 174, 189, 202, 234 <sup>b</sup> , 305 | 3,6-Man    | 64.8                                   | 43.6                                      | 77.2                                   | 67.0                                      |
|                                                                         |            | 61.2                                   | 39.9                                      | 35.4                                   | 42.0                                      |
| 118 <sup>b</sup> , 129, 139 <sup>b</sup> , 160, 202, 259, 333           | 3,4,6-Man  | 8.4                                    | 3.8                                       | 2.0                                    | 5.0                                       |
|                                                                         |            | 7.4                                    | 3.1                                       | 0.6                                    | 3.4                                       |
| 117, 129, 143, 145, 159, 203, 205                                       | t-GlcNAc   | 3.8                                    | 0.4                                       | 0.7                                    | 0.5                                       |
|                                                                         |            | 1.3                                    | 0.5                                       | 0.1                                    | 0.3                                       |
| 117, 129, 143, 159, 173, 203, 233                                       | 4-GlcNAc   | 32.5                                   | 5.7                                       | 19.1                                   | 6.6                                       |
|                                                                         |            | 13.7                                   | 6.3                                       | 2.2                                    | 6.0                                       |
| 117, 142, 159, 244, 301                                                 | 3,4-GlcNAc | 1.3                                    | 0.6                                       | 3.4                                    | 0.4                                       |
|                                                                         |            | 0.7                                    | 0.6                                       | 0.5                                    | 0.6                                       |
| 117, 143, 159, 261                                                      | 4,6-GlcNAc | 2.2                                    | 0.2                                       | 0.4                                    | 0.2                                       |
|                                                                         |            | 1.0                                    | 0.3                                       | 0.0                                    | 0.2                                       |

Permethylated N-glycans (non-desialylated and desialylated) were hydrolyzed, reduced, acetylated and analyzed by GC-MS ("Materials and Methods"). Upper panel values correspond to untreated PMAA linkage data (Untreated); lower panel values correspond to 4-F-GlcNAc-treated PMAA linkage data (4-F-GlcNAc). Values correspond to the relative abundance of the residue normalized to the abundance of 2-linked mannose.

a. Electron impact fragment ions used for identification of the PMAA residues.

b. For relative abundance, in order to minimize interferences from the baseline and/or contamination, all fragment ions greater than 100 (>100) were used for the extracted ion current (XIC) chromatogram, as indicated above, expect for the following residues: 2,4-linked mannose,  $m/z$  173 +  $m/z$  190 +  $m/z$  233; 2,6-linked mannose,  $m/z$  130 +  $m/z$  190; 3,6-linked mannose,  $m/z$  118 +  $m/z$  234; 3,4,6-linked mannose,  $m/z$  118 +  $m/z$  139

c. Relative abundances are expressed as follows: the integrated area peak of the extracted ion current (XIC) chromatogram of a specific residue was divided with the integrated area peak of the XIC chromatogram of 2-linked mannose.
